# Supplementary material for: Synaptic E3 Ligase SCRAPPER in Contextual Fear Conditioning: Extensive Behavioral Phenotyping of Scrapper Heterozygote and Overexpressing Mutant Mice
Source: PLoS One. 2011 Feb 24;6(2):e17317. doi: 10.1371/journal.pone.0017317 (PMC3044740; doi:10.1371/journal.pone.0017317)
Supplement: Table S1 — Comparison between Scrapper-knockout [SCR (+/−)] - and wild-type (WT) mice or Scrapper-transgenic (SCR-TG) - and WT mice. The p values indicate genotype effect in two-way ANOVA. ANOVA F values are given for the comparison of phenotypes between 2 genotypes. (XLS) [file pone.0017317.s001.xls]

## Sheet: TableS1
Table S1 Comparison between Scrapper-knockout [SCR (+/-)] and wild-type (WT) mice or Scrapper-transgenic (SCR-TG) and WT mice.
Tests	Measurements	Meanings		SCR (+/-)				TG
			Phenotypes	p-value	f-value		Phenotypes	p-value	f-value
General health and neurological screening	Body weight (g)	General health	→	0.4767	f(1,38)=0.517			0.0975	f(1,30)=2.926
	Body temperature (°C)		→	0.17	f(1,38)=1.957		→	0.9303	f(1,30)=0.008
	Wire hanging time (sec)		→	0.4482	f(1,38)=0.587		→	0.3253	f(1,30)=1.000
	Grip strength (N)		→	0.5601	f(1,38)=0.346		→	0.7935	f(1,30)=0.070
Light/dark transition test	Distance traveled Light (cm)	Anxiety	→	0.6535	f(1,38)=0.205		→	0.8949	f(1,30)=0.018
	Distance traveled Dark (cm)		→	0.1812	f(1,38)=1.855		→	0.3851	f(1,30)=0.777
	Stay time in light (sec)		→	0.2484	f(1,38)=1.374		→	0.9462	f(1,30)=0.005
	Transitions		→	0.6538	f(1,38)=0.204		→	0.5495	f(1,30)=0.366
	Latency to light (sec)		→	0.9396	f(1,38)=0.006		→	0.9099	f(1,30)=0.013
Open field test	Total distance (cm)	Exploratory activity,	→	0.4201	f(1,38)=0.664		→	0.8808	f(1,30)=0.023
	Vertical activity	affectivity, anxiety	→	0.5038	f(1,38)=0.455		→	0.757	f(1,30)=0.097
	Center time (sec)		↑	0.0267	f(1,38)=5.314		→	0.3411	f(1,30)=0.936
	Stereotypic counts		→	0.256	f(1,38)=1.330		→	0.4373	f(1,30)=0.620
Elevated plus maze test	Number of entries	Anxiety	→	0.327	f(1,38)=0.986		→	0.6095	f(1,29)=0.267
	Entries into open arms (%)		→	0.6773	f(1,38)=0.176		→	0.4133	f(1,29)=0.689
	Distance traveled (cm)		→	0.1372	f(1,38)=2.306		→	0.5023	f(1,29)=0.462
	Time on open arms (%)		→	0.18	f(1,38)=1.866		→	0.6414	f(1,29)=0.221
Hot plate test	Latency time (sec)	Pain sensitivity	→	0.1919	f(1,38)=1.766		→	0.5429	f(1,30)=0.379
Social interaction (Novel environment)	Total duration of contacts (sec)	Social behavior,		0.0759	f(1,17)=3.572		→	0.6697	f(1,14)=0.190
	Number of contacts	anxiety-like behavior	→	0.7118	f(1,17)=0.141		→	0.4178	f(1,14)=0.697
	Total duration of active contacts (sec)		→	0.7997	f(1,17)=0.066		→	0.4865	f(1,14)=0.511
	Mean duration/contact			0.0558	f(1,17)=4.215		→	0.7665	f(1,14)=0.092
	Distance traveled (cm)		→	0.1797	f(1,17)=1.958		→	0.8595	f(1,14)=0.032
Social interaction (Home cage)	Mean number of particle	Social behavior	→	0.727	f(1,14)=0.127		N.A.	-	-
	Activity level (Arbitrary Unit)	locomotor activity		0.0643	f(1,14)=4.035		N.A.	-	-
	Activity level in light period (Arbitrary Unit)	locomotor activity	↑	0.0433	f(1,14)=0.238		N.A.	-	-
	Activity level in dark period (Arbitrary Unit)	locomotor activity	→	0.6329	f(1,14)=4.935		N.A.	-	-
Social interaction (Crawley ver.)	1st general activity Total distance (cm)	Social behavior		0.0855	f(1,37)=3.122		N.A.	-	-
	1st general activity Avarage speed (cm per sec)	anxiety-like behavior		0.0837	f(1,37)=3.160		N.A.	-	-
	2nd general activity Total distance (cm)			0.074	f(1,38)=3.357		N.A.	-	-
	2nd general activity Avarage speed (cm per sec)			0.0743	f(1,38)=3.367		N.A.	-	-
Rota-rod test	Latency time (sec)	Motor coordination	→	0.6695	f(1,38)=0.185		→	0.6887	f(1,30)=0.164
Acoustic startle response	Sound level 110 dB	Auditory capacity		0.0728	f(1,38)=3.406		→	0.9224	f(1,30)=0.010
	Sound level 120 dB		→	0.173	f(1,38)=1.929		→	0.3778	f(1,30)=0.801
Prepulse inhibition (PPI) test	110 dB startle, prepulse sound level 74 dB (%)	Sensorimotor gating	→	0.5824	f(1,38)=0.308		→	0.8006	f(1,30)=0.065
	110 dB startle, prepulse sound level 78 dB (%)			0.0507	f(1,38)=4.071		→	0.3154	f(1,30)=1.042
	120 dB startle, prepulse sound level 74 dB (%)		→	0.5548	f(1,38)=0.355		→	0.2728	f(1,30)=1.248
	120 dB startle, prepulse sound level 78 dB (%)		→	0.6292	f(1,38)=0.237		→	0.5819	f(1,30)=0.310
Porsolt forced swimming test	Immobility Day1 (%)	Behavioral despair	→	0.5766	f(1,38)=0.317		→	0.7674	f(1,30)=0.089
	Immobility Day2 (%)		→	0.4586	f(1,38)=0.561		→	0.3009	f(1,30)=1.108
	Distance traveled Day1 (cm)		→	0.7588	f(1,38)=0.096		→	0.6841	f(1,30)=0.169
	Distance traveled Day2 (cm)		→	0.5106	f(1,38)=0.441		→	0.3674	f(1,30)=0.838
Fear conditioning test	Immediate freezing during conditioning phase (%)	Fear memory	↓	0.0276	f(1,38)=5.246		→	0.8367	f(1,30)=0.043
	Freezing during contextual test after conditioning (%)		↓	0.0266	f(1,38)=5.324		→	0.9514	f(1,30)=0.004
	Freezing during cued test with altered context (%)		→	0.1629	f(1,38)=2.025		→	0.1637	f(1,30)=2.038
Fear conditioning test	Freezing during contextual test after conditioning (%)			0.0541	f(1,38)=3.951		N.A.	-	-
after 8 days retention	Freezing during cued test with altered context (%)		→	0.1218	f(1,38)=2.505		N.A.	-	-
Tail suspension test	Immobility time (% during every 1 min block)	Behavioral despair	→	0.6489	f(1,37)=0.211			0.0518	f(1,30)=4.101
Barnes Maze	Probe test (24 hr retention) (sec)	Spatial working memory	→	0.2447	f(1,38)=1.396		N.A.	-	-
	Probe test (9 days retention) (sec)		→	0.8294	f(1,38)=0.047		N.A.	-	-
	Probe test (35 days retention) (sec)		→	0.9203	f(1,38)=0.010		N.A.	-	-
	Probe test (24 hr retention, Reverse) (sec)		→	0.7552	f(1,38)=0.099		N.A.	-	-
Gait analysis (front paw)	Stride duration (swing) (%)	Locomotion activity	→	0.4526	f(1,38)=0.576		N.A.	-	-
	Stride duration (brake) (%)		→	0.2171	f(1,38)=1.575		N.A.	-	-
	Stride duration (propel) (%)		→	0.5354	f(1,38)=0.391		N.A.	-	-
	Stance duration (brake) (%)		→	0.3573	f(1,38)=0.868		N.A.	-	-
	Stance duration (propel) (%)		→	0.3581	f(1,38)=0.866		N.A.	-	-
	Stance width (cm)		→	0.8092	f(1,38)=0.059		N.A.	-	-
	Stride lngth (cm)		→	0.1274	f(1,38)=2.428		N.A.	-	-
	Step angle (degree)		→	0.4839	f(1,38)=0.500		N.A.	-	-
	Paw angle (degree)		→	0.5063	f(1,38)=0.450		N.A.	-	-
Gait analysis (hind paw)	Stride duration (swing) (%)	Locomotion activity	→	0.6287	f(1,38)=0.238		N.A.	-	-
	Stride duration (brake) (%)		→	0.5194	f(1,38)=0.423		N.A.	-	-
	Stride duration (propel) (%)		→	0.351	f(1,38)=0.892		N.A.	-	-
	Stance duration (brake) (%)		→	0.4224	f(1,38)=0.658		N.A.	-	-
	Stance duration (propel) (%)		→	0.4224	f(1,38)=0.658		N.A.	-	-
	Stance width (cm)		→	0.863	f(1,38)=0.030		N.A.	-	-
	Stride lngth (cm)		→	0.5192	f(1,38)=0.423		N.A.	-	-
	Step angle (degree)		→	0.999	f(1,38)=0.000		N.A.	-	-
	Paw angle (degree)		→	0.215	f(1,38)=1.590		N.A.	-	-
Eight-arm radial maze	Different arm choices	Working memory	N.A.	-	-		→	0.8603	f(1,30)=0.031
	Revisiting errors		N.A.	-	-		→	0.4449	f(1,30)=0.599
→, no significant difference; ↑, increased, ↓, decreased in SCR (+/-) or SCR-TG mice compared to WT mice.
Skew arrows show the increasing or decreasing tendency judged from the p-values (0.05 < p < 0.1). N.A., not analyzed.
